# Supplementary material
Source: PubMed Central journal article supplement (PMC7322627)
Supplement: NIHMS1592050-supplement-Supplemental_figure.pdf [file NIHMS1592050-supplement-Supplemental_figure.pdf]

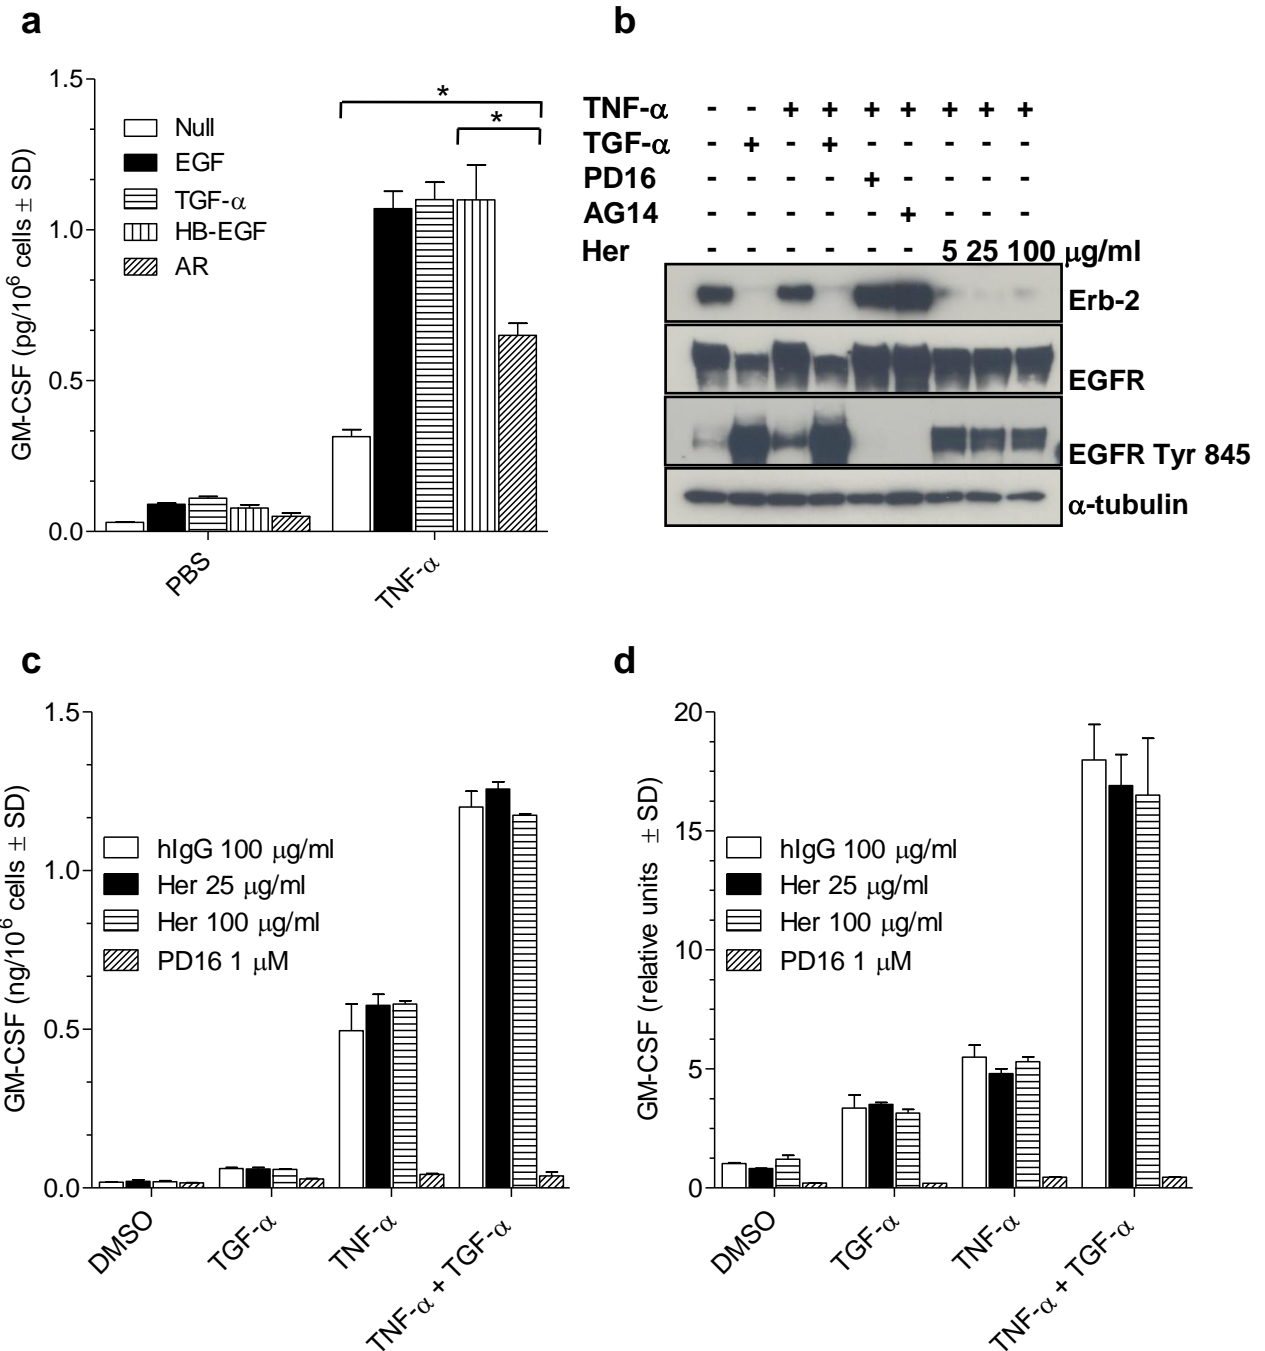

1  
2  
3  
4  
5  
6  
7  
8  
9  
10  
11  
12  
13  
14  
15  
16  
17  
18  
19  
20  
21  
22  
23  
24  
25  
26  
27  
28  
29  
30  
31  
32  
33  
34  
35  
36  
37  
38  
39  
40  
41  
42  
43  
44  
45  
46  
47  
48  
49  
50  
51  
52  
53  
54  
55  
56  
57  
58

Supplementary Fig.1

a) ELISA of GM-CSF levels in the supernatant of human keratinocytes after 24 hours stimulation with 10 nM of EGF, TGF- $\alpha$ , HB-EGF, AR in presence or absence of TNF- $\alpha$  50 ng/ml. b) Western Blot of lysates from human keratinocytes. Cells were stimulated for 15 min. with TNF- $\alpha$  (50 ng/ml) and/or TGF- $\alpha$  (50 ng/ml), directly or following 30 min incubation with PD168393, or AG1478 (1 $\mu$ M) or 3 hours incubation with Herceptin at the described doses. c) ELISA of GM-CSF levels in the supernatant of human keratinocytes after 24 hours stimulation with 50 ng/ml of TGF- $\alpha$  and/or 50 ng/ml of TNF- $\alpha$  50 ng/ml directly or following 3 hours incubation with Herceptin or control human IgG. d) Real Time PCR in the same condition of panel c with cells treated for 4 hours.
